# Supplementary material for: Baseline PET radiomics outperforms the IPI risk score for prediction of outcome in diffuse large B-cell lymphoma
Source: PubMed Central journal article supplement — Blood. 2023 Apr 5;141(25):3055–64. doi: 10.1182/blood.2022018558 (PMC10646814; doi:10.1182/blood.2022018558), 2023-04-05
Supplement: BLOOD_BLD-2022-018558-mmc1.pdf [file BLOOD_BLD-2022-018558-mmc1.pdf]

## Supplemental data

Supplemental Table 1. Baseline PET parameters of included studies

|                            | Total (n=1195)     | GSTT15 (n=97)       | HOVON-130 (n=65)     | HOVON-84 (n=308)    | IAEA (n=104)       | NCRI (n=133)       | PETAL (n=368)      | SAKK (n=120)       |
|----------------------------|--------------------|---------------------|----------------------|---------------------|--------------------|--------------------|--------------------|--------------------|
| <b>MTV</b>                 | 324.4 (81.7-828.8) | 384.6 (101.7-895.4) | 610.4 (187.0-1295.6) | 397.8 (133.9-933.6) | 191.1 (74.2-608.8) | 356.4 (92.3-838.9) | 261.8 (45.5-725.7) | 246.3 (73.5-743.2) |
| <b>SUV<sub>peak</sub></b>  | 17.6 (12.1-24.4)   | 19.9 (13.5-26.9)    | 17.7 (11.9-24.2)     | 17.6 (13.5-23.6)    | 14.6 (9.5-21.2)    | 20.8 (13.6-27.1)   | 18.1 (11.5-23.9)   | 15.7 (11.3-22.8)   |
| <b>Dmax<sub>bulk</sub></b> | 22.2 (4.8-41.2)    | 22.1 (10.9-43.4)    | 32.6 (18.6-47.0)     | 31.4 (14.3-46.8)    | 15.8 (10.0-24.8)   | 27.7 (88.9-42.9)   | 16.4 (0-39.3)      | 19.9 (8.2-38.8)    |

Data are presented as median (interquartile range). Abbreviations: MTV: metabolic tumor volume, Dmaxbulk: maximum distance between the largest lesion and any other lesion, SUVpeak: the peak of the standardized uptake value.

Supplemental Table 2. Model performance expressed as AUC for patients treated with R-CHOP only and AUCs after updating the clinicalPET model.

|              | All patients |             |            |             | R-CHOP only |             |            |             | Re-calibrated/updated radiomics model with all patients |             |
|--------------|--------------|-------------|------------|-------------|-------------|-------------|------------|-------------|---------------------------------------------------------|-------------|
|              | 2-year PFS   |             | 2-year TTP |             | 2-year PFS  |             | 2-year TTP |             | 2-year PFS                                              | 2-year TTP  |
|              | IPI          | clinicalPET | IPI        | clinicalPET | IPI         | clinicalPET | IPI        | clinicalPET | Radiomics                                               | clinicalPET |
| All patients | 0.62         | 0.71        | 0.62       | 0.71        | 0.62        | 0.71        | 0.62       | 0.71        | 0.71                                                    | 0.72        |
| GSTT15       | 0.63         | 0.72        | 0.62       | 0.71        | 0.64        | 0.75        | 0.62       | 0.74        | 0.73                                                    | 0.74        |
| HOVON-130    | 0.53         | 0.59        | 0.53       | 0.60        | -           | -           | -          | -           | 0.58                                                    | 0.59        |
| HOVON-84     | 0.67         | 0.75        | 0.69       | 0.79        | 0.67        | 0.75        | 0.69       | 0.79        | 0.75                                                    | 0.77        |
| IAEA         | 0.56         | 0.65        | 0.56       | 0.66        | 0.63        | 0.68        | 0.63       | 0.69        | 0.65                                                    | 0.64        |
| NCRI         | 0.56         | 0.71        | 0.59       | 0.70        | 0.56        | 0.71        | 0.59       | 0.70        | 0.71                                                    | 0.73        |
| PETAL        | 0.65         | 0.75        | 0.62       | 0.75        | 0.64        | 0.75        | 0.61       | 0.74        | 0.76                                                    | 0.79        |
| SAKK         | 0.51         | 0.71        | 0.51       | 0.70        | 0.51        | 0.71        | 0.51       | 0.70        | 0.70                                                    | 0.67        |

Abbreviations: R-CHOP: rituximab, cyclophosphamide, doxorubicin, vincristine and prednisone, TTP: time to progression, PFS: progression free survival, IPI: international prognostic index

Supplemental Table 3. Diagnostic measures of clinicalPET model after updating coefficients.

|          |            | Sensitivity         | Specificity         | PPV                 | NPV                 |
|----------|------------|---------------------|---------------------|---------------------|---------------------|
| Original | 2-year PFS | 39.18 (33.53-45.04) | 39.18 (33.53-45.04) | 39.18 (33.53-45.04) | 39.18 (33.53-45.04) |
|          | 2-year TTP | 86.95 (84.57-89.08) | 86.95 (84.57-89.08) | 86.95 (84.57-89.08) | 86.95 (84.57-89.08) |
| Updated  | 2-year TTP | 39.42 (65.44-81.84) | 87.61 (85.28-89.69) | 45.89 (40.18-51.72) | 84.43 (83.01-85.76) |
|          | 2-year PFS | 40.21 (34.53-46.09) | 87.28 (84.93-89.38) | 50.43 (44.93-55.93) | 81.93 (80.44-83.33) |

Abbreviations: PPV: positive predictive value, NPV: negative predictive value, TTP: time to progression , PFS: progression free survival

Supplemental Table 4. Model performances using cox regression modeling and 2-year PFS as outcome.

|             | C-index | AIC    |
|-------------|---------|--------|
| MTV/ECOG    | 0.63    | 4005.1 |
| IMPI        | 0.66    | 3983.3 |
| ClinicalPET | 0.69    | 3957.7 |
